# Supplementary material for: Single-Cell Sequencing Analysis Based on Public Databases for Constructing a Metastasis-Related Prognostic Model for Gastric Cancer
Source: Hindawi journal article supplement (doi:10.1155/2022/7061263), 2022-04-27

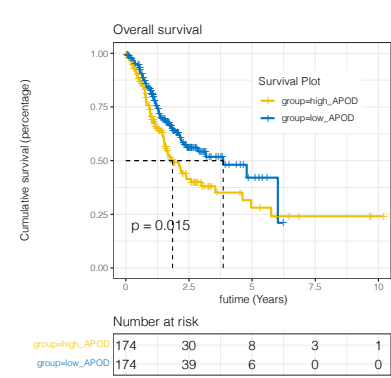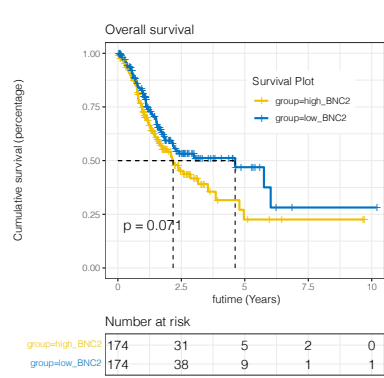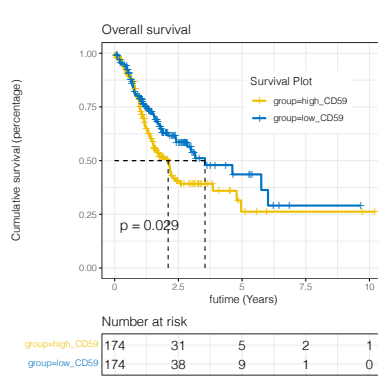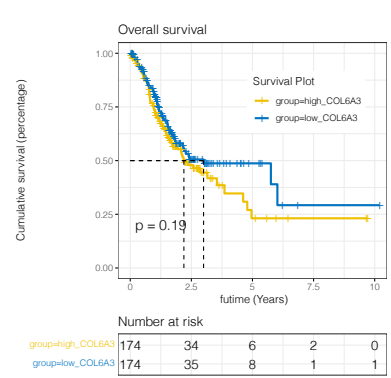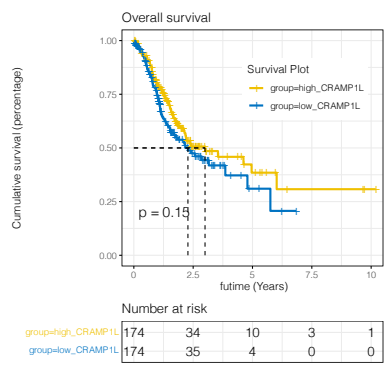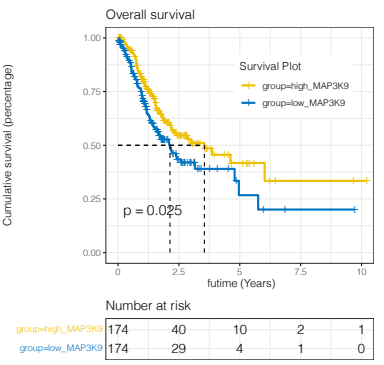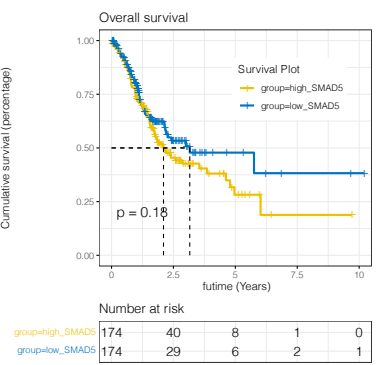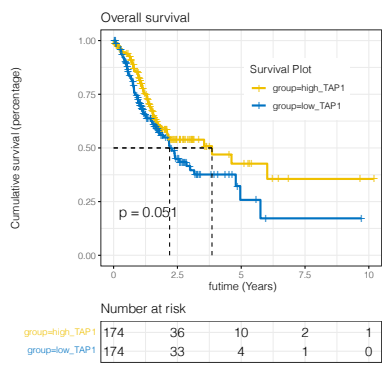

Supplement: f1 [file 7061263.f1.pdf]
